# Supplementary material
Source: Springer Nature journal article supplement (https://www.springermedizin.de/resource/supplementary/13069_2008_5_MOESM18_ESM.pdf/9659588)

**A**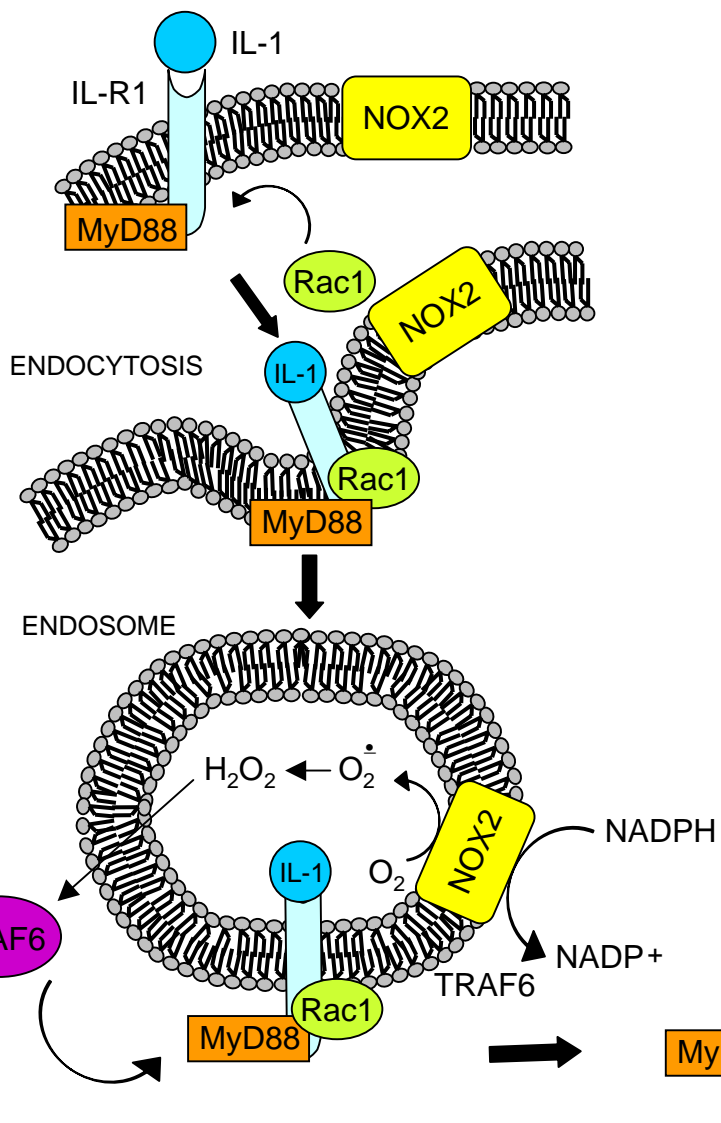**B**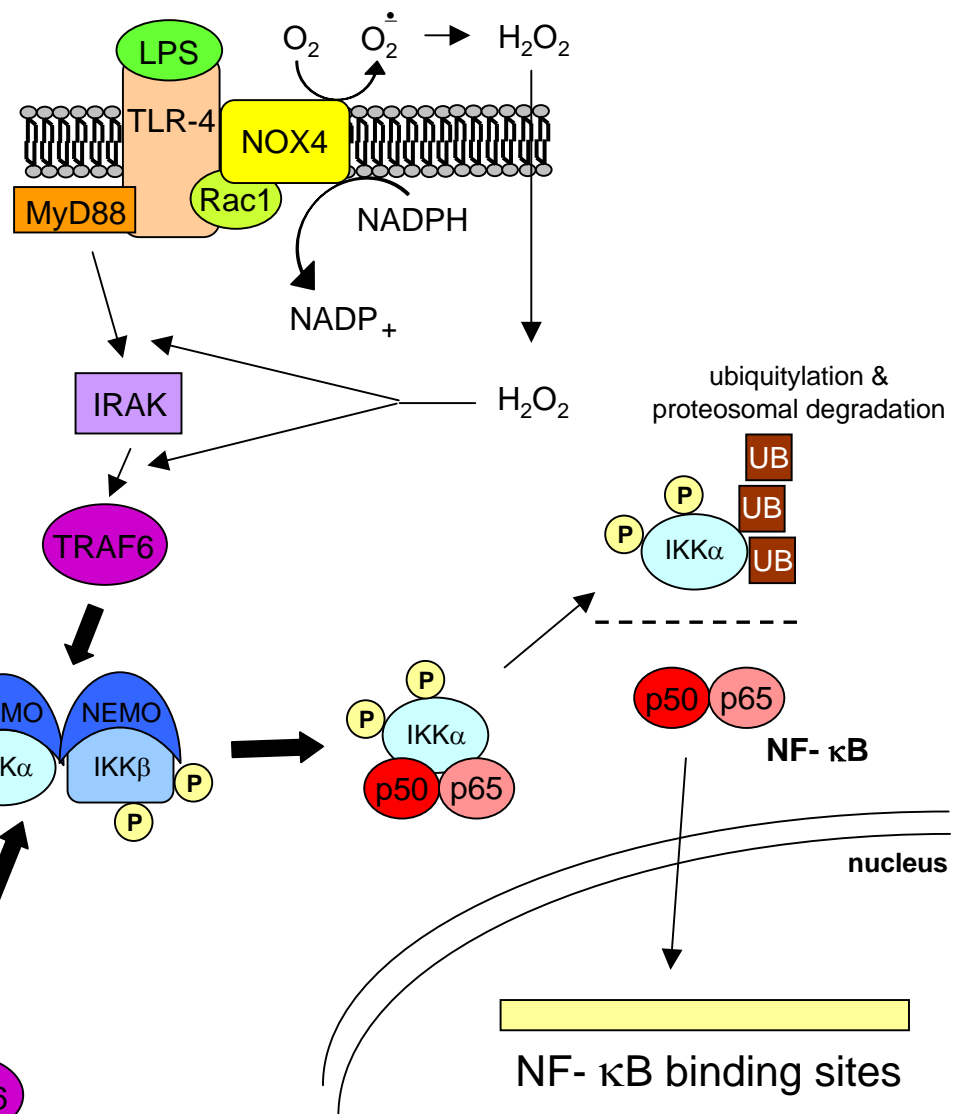

Supplement: MOESM18 [file 9659588]
